1 **In-situ detection of Tomato spotted wilt orthospovirus from crude plant extracts using**  
2 **Reverse Transcriptase- Recombinase Polymerase Amplification (RT-RPA) in endpoint and**  
3 **real-time.**

4 Juan Francisco Iturralde Martinez, and Cristina Rosa

5 Department of Plant Pathology and Environmental Microbiology, College of Agricultural Sciences,  
6 The Pennsylvania State University, University Park 16802 USA.

7 **Abstract**

8 Virus detection in early stages of infection could prove useful for identification and isolation of foci  
9 *of inoculum before its spread to the rest of susceptible individuals via vectoring insects. However,*  
10 *the low number of viruses present at the beginning of infection renders their detection and*  
11 *identification difficult and requires the use of highly sensitive laboratory techniques that are often*  
12 *incompatible with a field application.*

13 *To obviate this challenge, we designed a Recombinase Polymerase Amplification, a molecular*  
14 *technique that makes millions of copies of a predefined region in the genome, in this case of*  
15 *Tomato spotted wilt orthospovirus. The reaction occurs at 39 °C and can be used directly from*  
16 *crude plant extracts without nucleic acid extraction. Notably, a positive result can be seen with*  
17 *the naked eye as a flocculus made of newly synthesized DNA and metallic beads.*

18 *The objective of the procedure is to create a portable and affordable system that can isolate and*  
19 *identify viruses in the field, from infected plants and suspected insect vectors, and can be used*  
20 *by scientists and extension managers for making informed decisions for viral management.*  
21 *Results can be obtained in situ without the need of sending the samples to a specialized lab.*

22 **Introduction**

23 *Tomato spotted wilt orthospovirus (TSWV) causes extensive losses worldwide to various crops*  
24 *and ornamentals (Morsello & Kennedy, 2009) that can account to as much as 1 billion dollar*  
25 *(Ohnishi et al., 2006). These losses are in part due to the generalist nature of the virus that can*  
26 *infect up to 1000 species of plants, including monocots and dicots (Pappu, 2008) and has one of*  
27 *the largest host range on record for plant viruses (Hanssen, Lapidot, & Thomma, 2010).*  
28 *Furthermore, TSWV is transmitted in a propagative circulative manner by a dozen polyphagous*  
29 *and hard to control thrips species (Webb, Tsai, & Mitchell, 1998).The virus has an ambisense*  
30 *ssRNA genome, comprised of 3 segments named by size small (S), medium (M) and large (L),*  
31 *surrounded by coat proteins and enclosed by a lipidic envelope (Adkins, 2000; Pappu, 2008). Like*  
32 *for other plant viruses, virus and vector exclusion and eradication are the most effective control*  
33 *measures. The use of ultraviolet-reflective mulches, for instance, has been proven to be useful in*  
34 *avoiding primary spread (Funderburk et al., 2011).*

35 Early detection of TSWV and other plant pathogens is critical for adequate selection and  
36 deployment of counter measures (Ohnishi et al., 2006). Common techniques for detection of  
37 TSWV include RT-PCR (Roberts, Dietzgen, Heelan, & Maclean, 2000), immunostrips (Crosslin,  
38 Mallik, & Gudmestad, 2009), ELISA (Gonsalves & Trujillo, 1986) and Next Generation  
39 Sequencing (Hagen et al., 2011). While molecular assays necessitate expensive lab equipment,  
40 can be time consuming and require trained personnel (Babu et al., 2017), antibodies based  
41 immunostrips that can be used directly in the field do not offer a high degree of sensitivity, leading  
42 to the possibility of false negative and missed virus detection. Losses caused by a lack of

43 detection can be significant, especially for an economically important virus, such as  
44 TSWV. Providing a field-based, inexpensive, sensitive and easy-to-use detection assay would  
45 allow to test infected material, even before the onset of symptoms, and would result in better  
46 disease management.

47 Recombinase polymerase amplification (Piepenburg, Williams, Stemple, & Armes, 2006) is a  
48 nucleic acid sequence based amplification (NASBA) (Compton, 1991) that allows amplification,  
49 at low constant temperature (Lutz et al., 2010). Unlike Loop-mediated Isothermal amplification  
50 (LAMP), another isothermal amplification technique which requires a temperature of 65 °C, RPA  
51 can perform well at temperatures close to 37 °C, and even ambient temperature, although with  
52 lower efficiency (Z. A. Crannell, Rohrman, & Richards-Kortum, 2014). Because of this, RPA  
53 forgoes the need of a thermal cycler and bulky equipment and can be used in the field (Cabada  
54 et al., 2017) (Robertson & Nicholson, 2005). Even more conveniently, all reaction components  
55 can be lyophilized, allowing room temperature storage and transport under field conditions, and  
56 the assay can be performed by untrained personnel (Lutz et al., 2010). Mechanistically, RPA  
57 exploits a recombination and repair system found in phages (Bianco, Tracy, & Kowalczykowski,  
58 1998); one of its reagents consist of a nucleoprotein complex (recombinase + primer) that  
59 exchange non-template strand and primer, followed by extension by DNA pol, whilst proteins  
60 stabilize nascent ssDNA. The end-point product is usually detected using a commercially  
61 available amplification detection chamber or lateral flow devices (Lillis et al., 2016) which contain  
62 proprietary mixes of antibodies that detect FAM and biotin from the amplified products (Rohrman  
63 & Richards-Kortum, 2012).

64 In cases in which there is the need to follow RPA in real time, the design of the probe can be  
65 modified to move the FAM molecule closer to the recombination site and quenched in the intact  
66 probe. In this way, as the reaction happens, the FAM is cleaved and its concentration can be  
67 detected with a fluorometer, as directly proportional to the amount of amplicon being produced  
68 (TwistDx, 2009). Advantages of RPA are its readiness and affordability, specificity, sensitivity,  
69 speed and easiness of use (Lobato & O'Sullivan, 2018) as well as the possibility of multiplexing  
70 (Z. Crannell et al., 2016). Notably, the sensitivity and specificity of this reaction are comparable  
71 and sometimes even superior to that of PCR (Cabada et al., 2017). Because of these reasons,  
72 RPA is becoming a favorite technique for performing lab-on-a-chip microfluidics analyses that  
73 require minimum incubation and can give real-time measurements (Lutz et al., 2010).

74 Binding-flocculation detection of amplicons is a cheaper and equally sensitive approach for  
75 detection of RPA products. This techniques exploits the property of aggregation of newly-  
76 synthesized nucleic acid and magnetic beads, which form stable floccules under acidic conditions,  
77 indicating a positive result (Ng, Wee, West, & Trau, 2015). Interestingly, this same principle can  
78 be used for a variety of applications, including the detection of methylation (Wee, Ngo, & Trau,  
79 2015).

80 In this work, we present the creation of an RT-RPA assay specific for TSWV detection that can  
81 be interpreted with amplification detection chambers, flocculation essays or by real time PCR. We  
82 envision that such a test will become a useful addition to the toolkit already in use for TSWV  
83 diagnosis.

84

85

## 86 Results

### 87 End-point RPA can be visualized in amplification detection chambers

88 Crude extract from a *Nicotiana benthamiana* (*N. benthamiana*) leaf infected with TSWV was used  
89 for RT-RPA reaction and the results of the amplification were visualized in an Amplification  
90 detection chamber (Agdia, Elkhart, IN). As seen in Figure 1, both the control (top) and the test  
91 line (bottom line) were visible in the chamber where the extract from the infected leaf was loaded  
92 (left chamber). This result, indicates a positive amplification, confirming the presence of the dual  
93 labelled RT-RPA products and thus of TSWV in the mixture. A negative control, made with the  
94 crude extract of a non-infected plant, and one where water was used instead of leaf extract were  
95 also subjected to the same procedure. Results in Figure 1 (center and right chambers  
96 respectively) show that for both controls only the control line (top line) was visible, indicating a  
97 valid test but negative result.

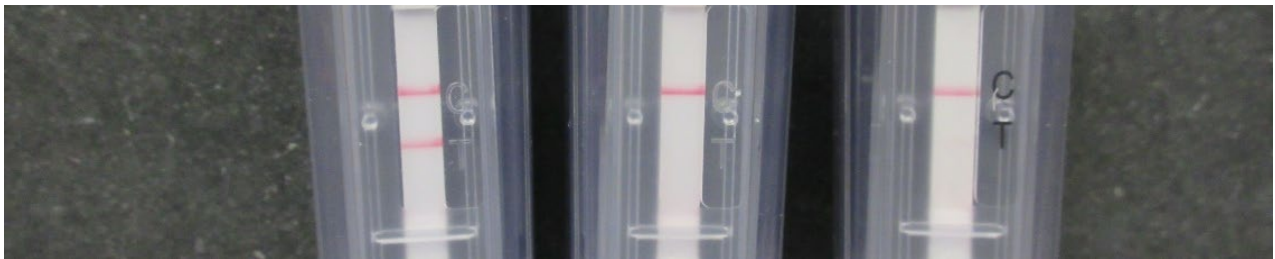

98

99 Figure 1: Result of end-point Reverse transcriptase RPA (RT-RPA) in amplification detection  
100 chambers (Agdia, Elkhart, IN). Left: positive result for crude extract of a TSWV infected *N.*  
101 *benthamiana* leaf, where both the control (top) and the test line (bottom) are visible. Center and  
102 Right: negative results for crude extract of an uninfected leaf and water respectively, where only  
103 the control line (top) is visible. NTC1: healthy *N. benthamiana*, NTC2: water.

### 104 End-point RT-RPA can be visualized by flocculation assay

105 After performing the RT-RPA amplification, the tubes were removed from the thermal block, SPRI  
106 (Solid Phase Reversible Immobilization) magnetic beads were added to the amplified fraction,  
107 washed with ethanol, followed by the addition of the acetate-based crowding agent. The tube that  
108 contained the crude extract of the TSWV infected *N. benthamiana* showed a stable flocculus on  
109 the bottom of the tube that did not break, despite flicking the tube repeatedly (Figure 2, left tube).  
110 Since the flocculus collects all the beads in the mixture in one small mass, the solution in the tube  
111 becomes clear. On the other hand, the vessel containing the non-target controls, did not form a  
112 stable flocculus and, due to the even distribution of beads in the mixture, the mixture remained  
113 opaque (Figure 2, center and left tube).

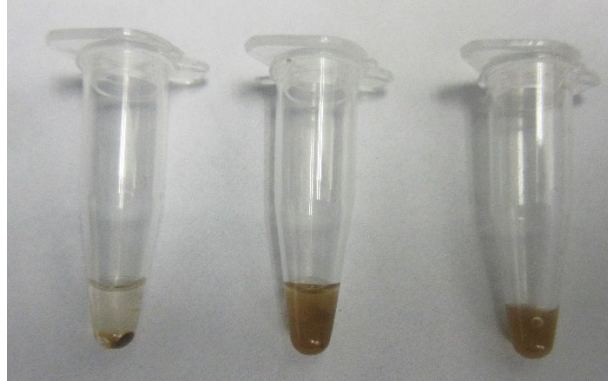

114

115 Figure 2: Result of end-point RT-RPA with SPRI beads. Left: positive result, after rehydrating the  
116 pellet and the amplification reaction, added SPRI beads react with the amplicon and form a stable  
117 flocculus in presence of an acetate-based crowding agent. Center and right: Negative results  
118 NTC1: healthy *N. benthamiana*, NTC2: water, the beads are spread throughout the solution  
119 making it opaque.

### 120 TSWV RT-RPA assay can detect multiple TSWV isolates in multiple plant species

121 To ensure that our RT-RPA assay would detect different TSWV isolates and in different plant  
122 species, we repeated the RT-RPA reaction for two more TSWV isolates: TSWV-Chrys5, isolated  
123 from Chrysanthemum and maintained in *Nicotiana benthamiana*, TSWV-Tom2, isolated from  
124 *Solanum lycopersicum* and maintained in *N. benthamiana*, and TSWV-PA01, isolated from  
125 *Capsicum annuum* and maintained in *Emilia sonchifolia* (Margaria and Rosa 2016). All isolates  
126 were originally detected via immunostrips (Agdia, Elkhart, IN) and isolated to single lesions to  
127 ensure the presence of a single viral species. Our RT-RPA assay was able to detect all the three  
128 isolates in all 3 plant species, even if with different sensitivity. Nevertheless, the reaction for  
129 TSWV-PA01 was rather weak, when visualized in the amplification detection chambers, but  
130 equally positive, when using the flocculation assay.

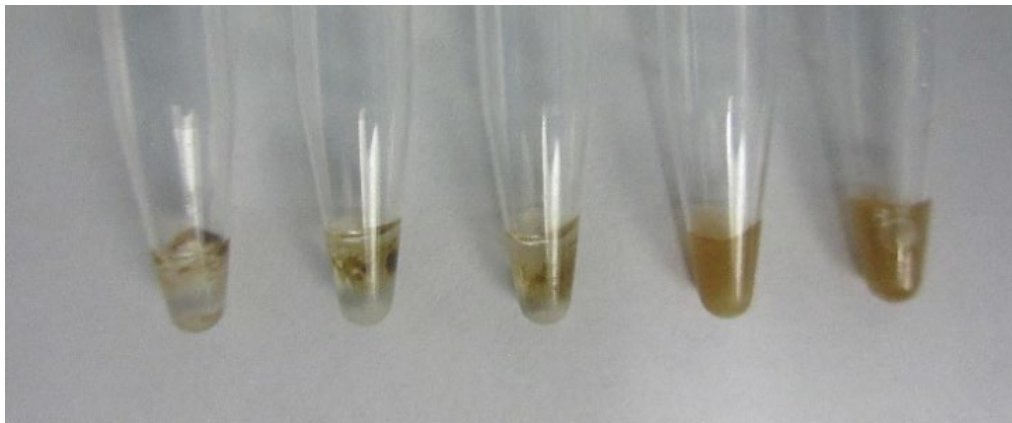

131

132 Figure 3: RT-RPA results for three isolates of TSWV revealed with a flocculation assay. TSWV-  
133 Chrys5, TSWV-Tom2, TSWV-PA01, NTC1: healthy *N. benthamiana*, NTC2: water.

134

135

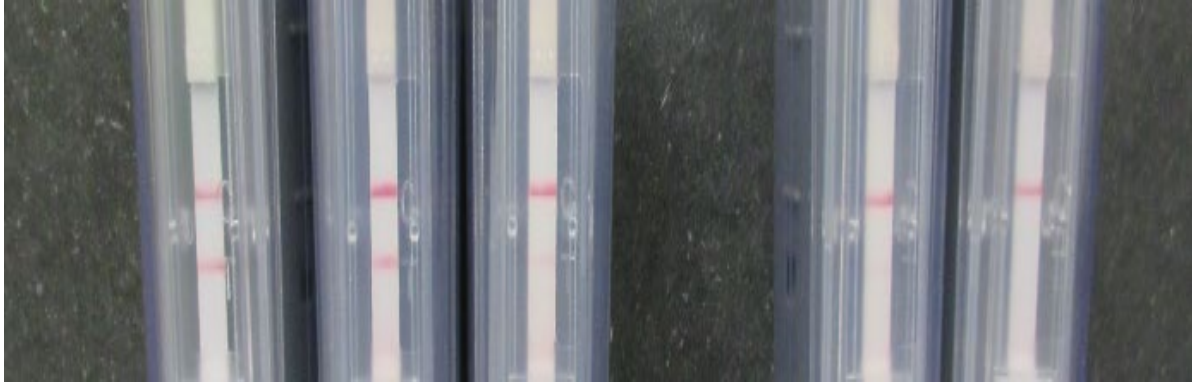

136

137

138

139 Figure 4: Right: RT-RPA positive result for three isolates of TSWV revealed with an amplification  
140 detection chambers. TSWV-Chrys5, TSWV-Tom2, TSWV-PA01 (faint test band), NTC1: healthy  
141 *N. benthamiana*, NTC2: water.

142

143

#### 144 **TSWV specific RT-RPA can be visualized by fluorescence in real time**

145 The RT-RPA amplification was followed in real time using the SYBR/FAM channel of a Bio-Rad  
146 CFX 96 thermal cycler (Bio-Rad, Hercules, CA). As expected, a positive RT-RPA reaction showed  
147 an amplification curve similar to curves typically generated by real-time PCR for the crude extract  
148 of a TSWV *N. benthamiana* leaf. The two negative controls, containing both the crude extract of  
149 an uninfected leaf and water (non-target controls) did not show an amplification curve.

150

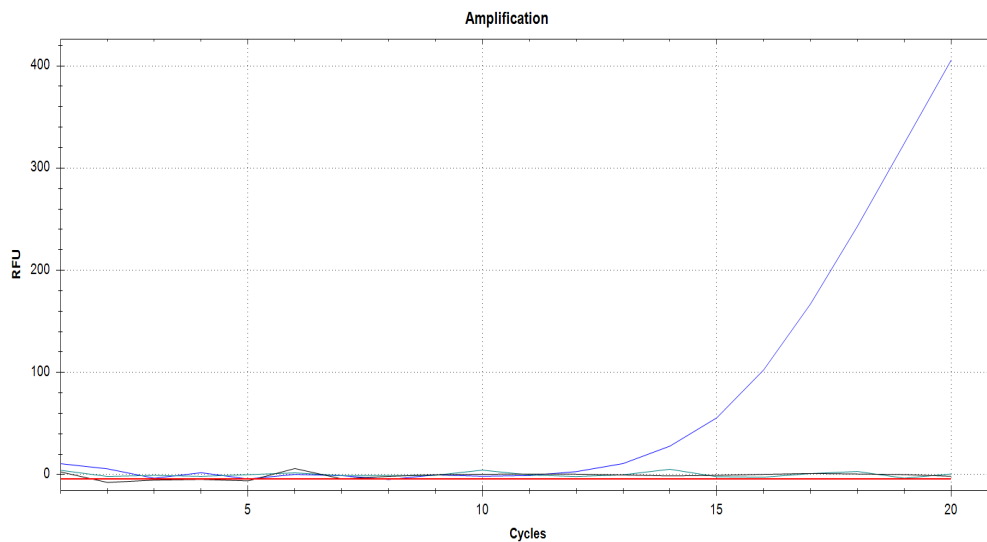

151

152 Figure 5: Result of real-time RT-RPA visualized in the SYBR/FAM channel of a Bio-Rad CFX96  
153 real time PCR thermal cycler kept isothermally at 39 °C. Like real time PCR, an amplification curve

154 is visible (blue). The non-target controls (black and green) did not produce an amplification curves  
155 in the 20 minutes the reaction took place. Black lines NTC1: healthy *N. benthamiana*, NTC2:  
156 water.

157

### 158 **Standard curve**

159 For standard curve analyses, a qRT-PCR product was purified from a completed PCR reaction;  
160 then its concentration was measured and used to make serial dilutions. The number of copies of  
161 template was calculated using the equation (1)

162 The standard curve, calculate by making a linear regression of the obtained Cq in the y-axis vs.  
163 the  $\log_{10}$  of the calculated number of copies in the x-axis, is shown in Figure 6.

164

165

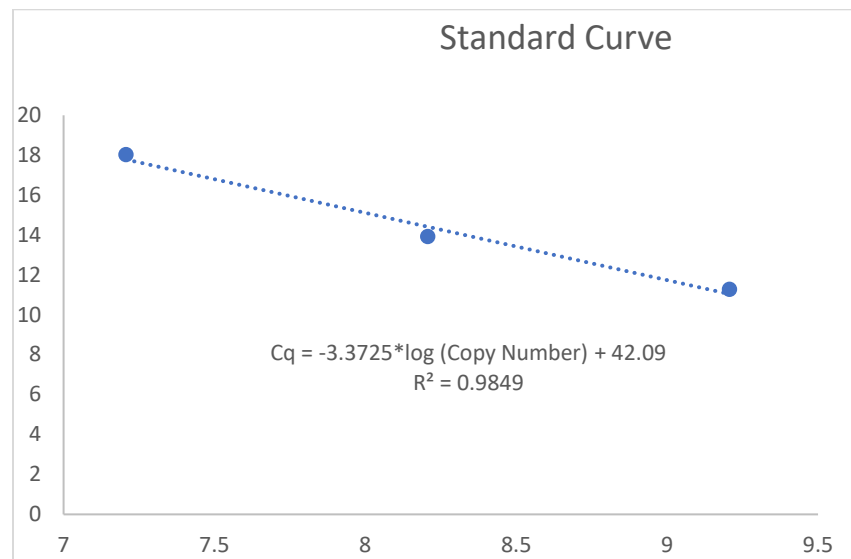

166

167 Figure 6: Standard curve computed for absolute quantification. The curve was built by purifying  
168 the RT-qPCR amplicon and making 10-fold serial dilutions of it. The obtained Cq for the  
169 dilutions was used for a linear regression with the estimated concentrations (measured by  
170 nanodrop).

### 171 **Quantification of starting material**

172 Fifty microliters of the TSWV infected *N. benthamiana* extract were subjected to RNA extraction,  
173 followed by a one-step real time PCR (Figure 7). The calculated Cq for TSWV in 50 microliters of  
174 lysate was close to 1.61, which interpolated in the standard curve regression equation (1), shown  
175 in Figure 6, gave an approximate of 6.02333E+12 copies of the amplified portion of the TSWV L  
176 genomic segment). Since only 2 microliters of this solution were used for the crude extracts and  
177 all its dilutions, this gives an estimated initial concentration of 2.40933E+11 genomic segments.

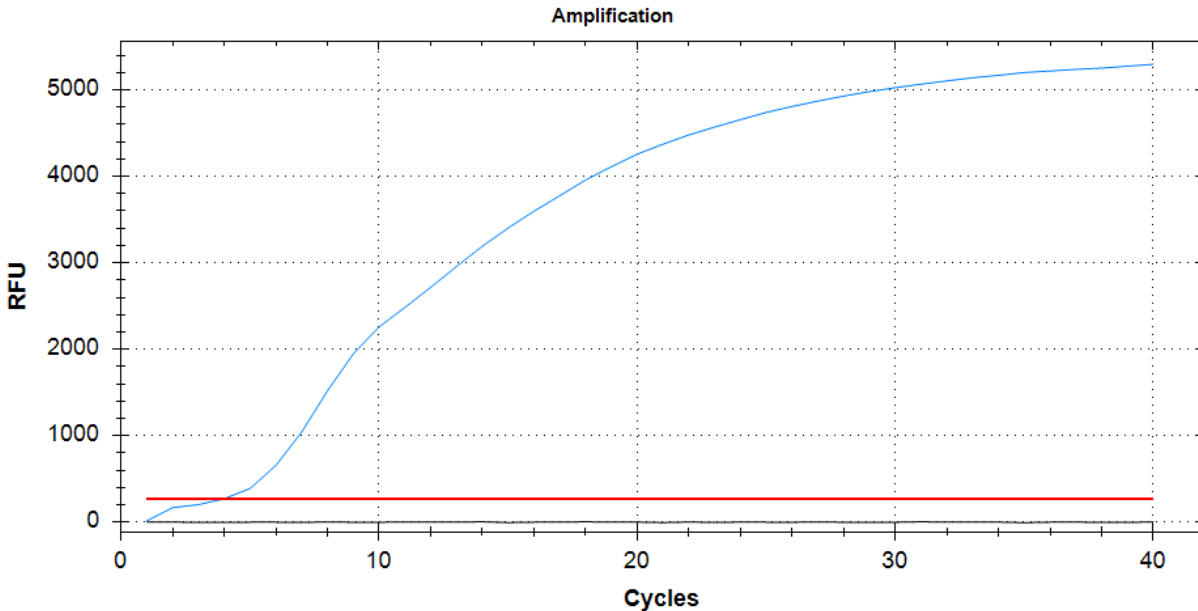

178

179 Figure 7: qRT-PCR Amplification curve. RNA was extracted from 50  $\mu$ l of plant lysate and  
180 amplified via one-step qRT-PCR for 40 cycles. The amplification curve is visible with a Cq of  
181 1.61 cycles.

182

### 183 Sensitivity assay

184 Serial dilutions of the crude extracts used for the above experiments were subjected to RT-RPA  
185 and visualized in a detection chamber (Agdia, Elkhart, IN). After 20 minutes of incubation, all the  
186 dilutions of the crude extract from the TSWV infected plant, from undiluted to  $10^{-12}$  (~1 copy of  
187 TSWV genomic segment) showed two bands, indicating a positive result and establishing the  
188 theoretical sensitivity of the assay at 1 viral copy. The negative controls showed only the control  
189 line (Figure 8).

190

191

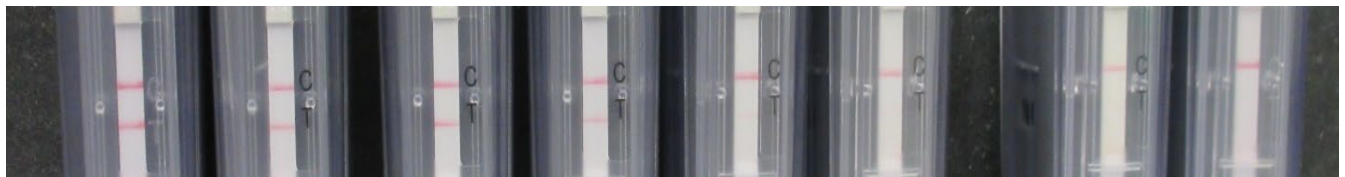

192

193 Figure 8: Serial dilutions of a crude extract visualized in amplification detection chambers. From  
194 left to right, undiluted sample,  $10^{-4}$  ( $2^7$  copies),  $10^{-8}$  ( $2^4$  copies),  $10^{-12}$  (~1 copy)  $10^{-16}$  (out of range),  
195  $10^{-20}$  (out of range) all showing both control and test lines indicating a positive result. To the  
196 rightmost side, the two non-target controls NTC1: healthy *N. benthamiana*, NTC2: water were  
197 tested, which only showed the control line.

198

199 Replicas of the 1:10 dilutions were interpreted with the flocculation assay, showing similar  
200 results, all the dilutions, up to  $10^{-12}$  showed a dark precipitate that remained stable even after  
201 flicking the tubes repeatedly (Figure 9).

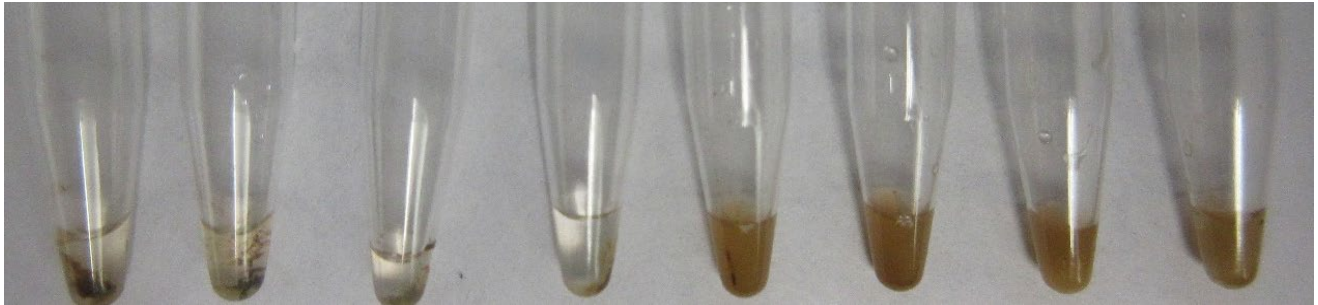

202  
203 Figure 9: Serial dilutions of a crude extract visualized with SPRI beads. From left to right, undiluted  
204 sample,  $10^{-4}$  ( $2^7$  copies),  $10^{-8}$  ( $2^4$  copies),  $10^{-12}$  (~1 copy)  $10^{-16}$  (out of range),  $10^{-20}$  (out of range),  
205 all showing a flocculus indicating a positive result due to the presence of the amplicon;  $10^{-16}$  and  
206  $10^{-20}$  show no amplification. Last two tubes: NTC1: healthy *N. benthamiana*, NTC2: water.

207 Finally, the results for real time RT-RPA for some of the above dilutions from undiluted to  $10^{-20}$   
208 in  $10^{-4}$  increments showed differential amplification curves (Figure 10)

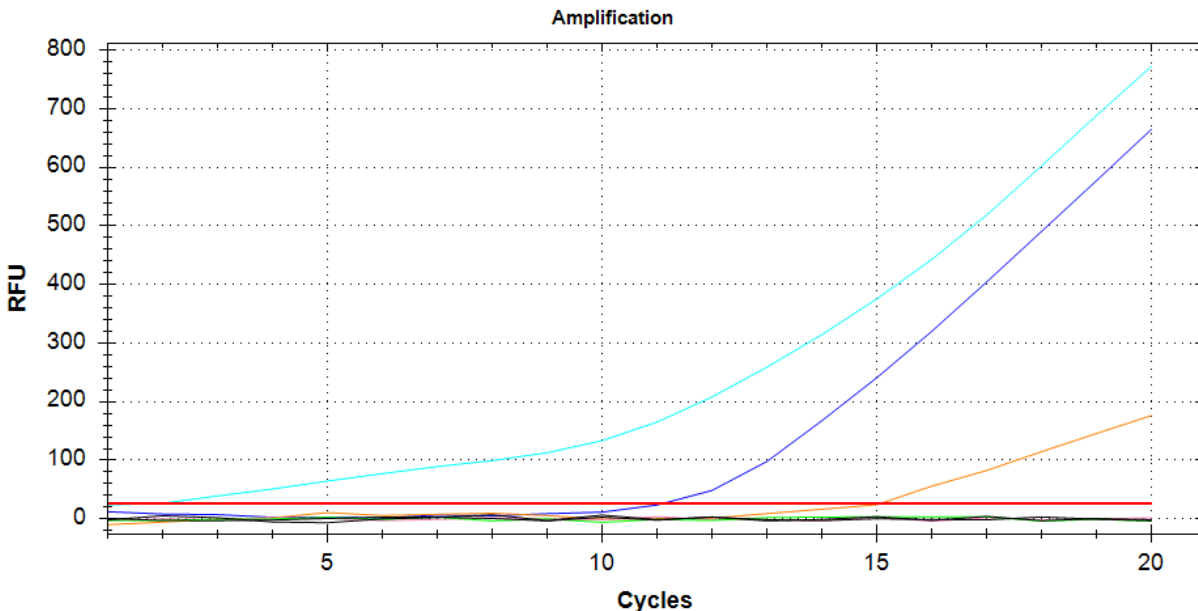

209  
210 Figure 10: Serial dilutions of a crude extract visualized in the SYBR/FAM channel of a Bio-Rad  
211 CFX96 real time PCR thermal cycler kept isothermally at 39 °C From left to right, teal: Crude  
212 extract, blue:  $10^{-4}$  ( $2^7$  copies), orange:  $10^{-8}$  ( $2^4$  copies), pink:  $10^{-12}$  (~1 copy), green:  $10^{-16}$  (out of  
213 range), yellow:  $10^{-20}$  (out of range), Black: NTC1: healthy *N. benthamiana*, NTC2: water.

## 214 Discussion and Conclusions

215 Plant viruses are a threat to food security, because of the huge amount of losses (sometimes as  
216 high as 100%, for the case of Tomato spotted wilt virus (TSWV) they cause on crops. As viruses  
217 are cellular parasites, no curative measures are available for treating plants, other than



218 prophylactic interventions aimed at controlling their vector and avoid transmission to new hosts  
219 (Nicaise, 2014)

220 RT-RPA has been already used for detection of other plant viruses, such as Rose rosette virus  
221 (Babu et al., 2017), Plum pox virus (Zhang et al., 2014), Little cherry virus-2 (Mekuria, Zhang, &  
222 Eastwell, 2014), Yam mosaic virus (Silva, Bömer, Nkere, Kumar, & Seal, 2015) as well as  
223 detection at species/subspecies level of Potato virus Y and Wheat dwarf virus (Glais & Jacquot,  
224 2015).

225 The results of the RT-RPA molecular detection technique developed in this study prove that crude  
226 extracts of TSWV infected plants can be used directly for sensitive and reliable detection of the  
227 virus with a portable but robust technique. In fact, we were able to tailor TSWV specific primers  
228 and probes that work with Agdia's RT-RPA detection chambers and ABM flocculation beads. Our  
229 results were confirmed by real time PCR amplification. In the case of real time PCR, it is  
230 noteworthy that the appearance of amplification curves obtained was atypical and not linear,  
231 suggesting that this assay is not the ideal one to quantify an RT-RPA product, but it should be  
232 used more as a qualitative tool for assessing the presence or absence of target. This result is  
233 expected, since the design of this assay is suitable for use with a fluorometer and was not  
234 intended to be used in real time PCR thermal cyclers. The produced RT-RPA amplicons could  
235 also be visualized and characterized using agarose electrophoresis, nonetheless, as other  
236 researchers report, the assay can have a carryover of protein that can impose a limitation in the  
237 proper migration of the amplified nucleic acid during the electrophoresis if a purification is not  
238 performed (Babu et al., 2017).

239 As seen by Zhang et al. (2014) the level of sensitivity of RT-RPA is very high, and allowed us to  
240 reach the theoretical detection of one copy of TSWV RNA segment. This unsurpassed sensitivity  
241 is intrinsic to RT-RPA, that combines nucleic acid amplification with serological detection.

242 In conclusion, we were able to design a molecular technique for the rapid and sensitive detection  
243 of *Tomato spotted wilt orthotospovirus* that is portable and can be interpreted using three different  
244 tools: amplification detection chambers, SPRI beads + crowding agent and fluorometry, using a  
245 modified probe. All these techniques can be used interchangeably for a qualitative detection of  
246 TSWV and can be scaled up for lab-on-a-chip applications or point-of-care detection of virus, to  
247 make quicker informed decisions in resource-limited environments, and without the need of  
248 trained personnel.

## 249 **Materials and Methods**

### 250 **Plant rearing and infection**

251 *Nicotiana benthamiana* seeds were germinated in Sunshine #4 aggregate plus soil mix (Sungro,  
252 Agawam, MA) for 1 week and the resulting seedlings were transplanted in 4" square pots and  
253 reared for 2 weeks. After this, 18 plants were inoculated using around 1g of TSWV-Chrys 5  
254 infected *N. benthamiana* tissue homogenized with mortar and pestle into chilled Paul's buffer (5  
255 mM diethyldithiocarbamate –DIECA-; 1 mM Disodic Ethylenediaminetetraacetate –EDTA-; 5 mM  
256 sodium thioglycolate in 0.05 M phosphate buffer pH 7) (Mautino, Sacco, Ciuffo, Turina, & Tavella,  
257 2012; Van Leeuwen, Arrieta, Guiderdone, Turina, & Ciuffo, 2017) amended with a dash of  
258 carborundum and activated charcoal. Other 18 *N. benthamiana* plants were inoculated using  
259 TSWV-Tom2. All plants were kept in a growth chamber at 60% relative humidity and a photoperiod  
260 of 16/8 hrs day/night for at least 7 days.

261 Similarly, seeds of *Emilia sonchifolia* were germinated in petri dishes for 1 week and transferred  
262 to pots of Sunshine #4 aggregate plus soil mix (Sungro, Agawam, MA) and reared for 2 weeks in  
263 a 16/8 hrs day/night photoperiod, relative humidity was not controlled for this case. With the  
264 described process, TSWV-PA01 was inoculated and harvested 7 days after.

## 265 **Sample homogenization**

266 Leaf tissue was collected 7 days post infection, transferred to an extraction bag (Bioreba,  
267 Switzerland) and mixed with 5 ml of phosphate buffered saline (VWR, West Chester, PA), hand  
268 homogenized using a hand-held tissue homogenizer (Agdia, Elkhart, IN) and kept at room  
269 temperature for the remainder of the experiment. Serial dilutions of this extract were made, when  
270 necessary, by mixing 20 µl of extract with 180 µl of nuclease-free water and repeating this process  
271 in series for up to 20 times.

## 272 **Amplification**

273 Endpoint: AmplifyRP Acceler8 (Agdia, Inc., Elkhart, IN) reaction pellets were rehydrated  
274 accordingly to the manufacturer's instructions. Additionally, iScript Reverse Transcriptase (Bio-  
275 Rad, Hercules, CA), was provided externally for converting RNA into cDNA, alongside modified  
276 primers and a the Acceler8 probe, both provided by Integrated DNA Technologies (IDT, Coralville,  
277 IA).

278 The probe and primers were designed according to the Assay Design Help Book from Agdia  
279 (<https://d163axztq8am2h.cloudfront.net/static/doc/b0/4f/4e8d445a51f202f9f57f24a74c8d.pdf>).

280 The special considerations to design the probe are here summarized: Less than 50 nt long (42),  
281 idSp is the abasic spacer (also known as THF) site that replaced a T, there are 30 spaces between  
282 the Fluorophore (FAM) and the abasic site and at least 15 from this site and the 3' spacer. Our  
283 TSWV specific Acceler8 Probe: 5'-/56-FAM/AT TGT ACA AAG GTT TGT TTC GGA ATA AAT  
284 CTA GG /idSp/AT TCG CAA CCT AAT CT/3SpC3/-3' was designed starting at position 3070 to  
285 3163 on the TSWV sequence with accession NC\_002050.1 (L segment)

286 The primers were designed using Primer Blast (Ye et al., 2012) automatic parameters namely,  
287 the target was set to TSWV with accession NC\_002050.1 with the option of searching for other  
288 isolates from the Refseq Representative Genome Database by limiting the organism field to  
289 *Tomato spotted wilt orthotospovirus* (taxid:1933298), the maximum, optimum and minimum  
290 primer sizes were set to 30, 33 and 36 nt respectively, the size of the amplicon was limited from  
291 100 to 230 nt. Finally, a biotin was added to the 5' end of the reverse primer. The final primer  
292 sequences are listed as follows Reverse: 5'-/5BiosG/ATATTGTTATAGAAGGTCCTAATGATT-3',  
293 Forward: 5'- GAATCTATTATACCATTCTCAATCTCTTAGC -3'.

294 An abasic site on the middle of a probe is needed for a nuclease to cleave and release the blocking  
295 group, allowing the polymerase contained as well in the mixture to extend the probe (Lobato &  
296 O'Sullivan, 2018). The reverse primer contains a 5' biotin label and it forms with the probe a dual  
297 labeled FAM-biotin amplicon that can be detected with antibodies (Daher, Stewart, Boissinot, &  
298 Bergeron, 2016).

299 For performing the reaction, according to the manufacturer's procedure, dry reaction pellets in 0.2  
300 ml tubes from the AmplifyRP® Discovery Kits (Agdia, Elkhart, IN) were hydrated with: 5.75 µl of  
301 rehydration buffer; 0.5 µl of each, primers at 10 µM; 0.25 µl of 10 µM probe, 0.5 µl of iScript  
302 Reverse Transcriptase (Bio-Rad, Hercules, CA), were mixed with a 2 microliters of crude plant

303 extract and with a reaction pellet. Following manufacturer's suggestions, the last 0.5 µl of 280 mM  
304 Magnesium acetate (MgOAc) were added to the lid of the microfuge tube and spun down to  
305 complete the 10 µl reaction.

306 Upon closing the vessel, the reaction was maintained at 39 °C for 20 min in a portable thermal  
307 block (Agdia, Elkhart, IN), and the results interpreted afterward. For non-target controls, water  
308 was used instead of the plant extract, as well as the extract from a healthy plant.

### 309 **Revealing of results: Amplification detection chambers**

310 The 0.2 ml tubes were collected from the portable thermal block and inserted in the designated  
311 slot in the Amplification detection chambers (Agdia, Elkhart, IN). After this, the tube was smashed  
312 into the amplification detection chamber, freeing both the RT-RPA product and the proprietary  
313 solution and this device was left undisturbed while the liquids moved upwards through the lateral  
314 flow immunostrip for 20 mins.

### 315 **Revealing of results: Flocculation essay**

316 For cheaper and in-field visualization methods, we also tried the method of (Koo, Wee,  
317 Mainwaring, & Trau, 2016) for which, two volumes of SPRI (Solid Phase Reversible  
318 Immobilization) magnetic beads (Applied Biological Materials, Richmond, BC, Canada) were  
319 added to the amplified RT-RPA products, incubated for 5 mins and then vortexed thoroughly for  
320 10 seconds.

321 The tubes containing the mixture were placed on a magnetic rack and the supernatant was  
322 discarded and replaced by 50 µl of 80% ethanol, the mixture was then incubated for 5 min and  
323 vortexed 10 seconds again. Finally, the tubes were placed into the magnetic rack again and the  
324 ethanol was discarded, the tubes were open to air dry for 5 minutes and 50 µl of crowding solution  
325 comprised of 3M sodium acetate and 20% Tween were added.

### 326 **Real time**

327 Like in the End point assay, pellets of AmplifyRP Acceler8 (Agdia, Inc., Elkhart, IN) were  
328 rehydrated using rehydration buffer, MgOAc, primers, XRT probe and reverse transcriptase. The  
329 XRT probe was designed according to the instructions from the Assay design book from Agdia,  
330 and synthesized by Integrated DNA Technologies (IDT, Coralville, IA).; the same primers as the  
331 end-point essay were used.

332 The XRT probe has the same sequence as the designed Acceler8 probe but contains a few  
333 modifications for being used in real-time, according to the Assay design book. Namely: the FAM  
334 was moved from the 5' end to one side of the abasic site and attached to a T, a black hole  
335 quencher was added to the other side of the abasic site and attached to a T nucleotide as well.  
336 Probe:5'-ATTGTACAAAGGTTTGTTCGGAATAAATC/iFluorT/AGG/idSp/AT/iBHQ-  
337 1dT/CGCAACCTAATCT/3SpC3/-3'

338 For this case, to every dried amplification pellet, 5.75 µl of rehydration buffer were added; 0.5 µl  
339 of each, primers at 10 µM; 0.25 µl of 10 µl XRT probe, 0.5 µl of iScript Reverse Transcriptase  
340 (Bio-Rad, Hercules, CA), were mixed with a 2 microliters of crude plant extract and with a reaction  
341 pellet. Following manufacturer's suggestions, the last 0.5 µl of 280 mM Magnesium acetate  
342 (MgOAc) were added to the lid of the microfuge tube and spun down to complete the 10 µl  
343 reaction.

344 For measuring the production of FAM, the vessels were inserted in a Bio-Rad CFX-96 system for  
345 real time PCR with a custom-made program that consisted of 20 cycles at 39 °C, with a plate read  
346 step every minute. The channel for SYBR/FAM that measures emission at 520 nm was used for  
347 collecting fluorescence.

### 348 **Standard curve**

349 For standard curve analyses, a qRT-PCR product was purified from a complete PCR reaction  
350 using the Zymo DNA Clean & Concentrator™-5 kit (Zymo Research, Irvine, CA) and eluted in 10  
351 µl of nuclease-free water; then its concentration was measured by a Nanodrop 2000  
352 spectrophotometer (Thermo Scientific, Wilmington, DE). Serial dilutions were prepared by adding  
353 10 µl of the original amplicon to 90 µl of nuclease free water for each case. Then, the number of  
354 copies of template was calculated using the following formula:

$$355 \text{ Number of copies} = \frac{(\text{amount in ng} * 6.022 * 10^{23})}{(\text{size in bp} * 1 * 10^9 * 650)} \quad (1)$$

356 Equation 1 . Where  $6.022 * 10^{23}$  corresponds to the Avogadro's number for number of molecules  
357 per mol,  $10^9$  nanograms of exist in one gram and 650 is the average molecular weight in  
358 Daltons or g/mol of a pair of bases of DNA (double stranded). The standard curve was made by  
359 making a linear regression of the obtained C<sub>q</sub> in the y-axis vs. the log<sub>10</sub> of the calculated  
360 number of copies in the x-axis.

### 361 **Quantification of starting material**

362 Fifty microliters of *N. benthamiana* lysate were transferred to a 1.5 ml microfuge tube and  
363 amended with three volumes of TRIzol LS (Life technologies) and incubated for 3 minutes. Then,  
364 a volume of 100% ethanol was added and vortexed for 10 seconds. Finally, Directzol (Zymo  
365 Research) kit was used to extract the total RNA, following the manufacturer instructions.

366 The total RNA was checked in a Nanodrop (ThermoFisher Scientific) spectrophotometer and  
367 diluted to 250 ng/µl to be used in real time PCR. The RT-qPCR reaction was performed using a  
368 the iTaq™ Universal SYBR® Green One-Step Kit , containing 10 µl of 2X (Bio Rad, Hercules,  
369 CA), 0.25 µl of iTaq™ Universal SYBR® Green (Bio-Rad, Hercules, CA), 1X iScript Reverse  
370 Transcriptase (Bio-Rad, Hercules, CA), 10 mM of the primers L\_TSTW\_Fw\_Short 5'-  
371 GCTCTCCTRTCCACCATCTAC-3'; L\_TSTW\_Rv\_Short 5'-TTGCTGTCAAGGCACACATTTT-3  
372 (Iturralde-Martinez, 2017) designed to amplify a 136 bp amplicon in the TSWV L genomic  
373 fragment.

374 The cycling conditions for the qRT-PCR included a reverse transcription at 50 °C for 10  
375 min, an initial denaturation at 95 °C for 1 min, followed by 40 cycles of denaturation at 95  
376 °C for 10 s, and combined annealing/extending at 60 °C for 30 s, according to the  
377 manufacturer's instructions.

### 378 **Sensitivity assay**

379 Serial dilutions of crude extract were made by mixing 10 µl of lysate with 90 µl of nuclease-free  
380 water, and then 10 µl of this solution were mixed with 90 µl more and so on (1:10). From each  
381 dilution, 2 µl were taken directly and mixed with the master mix for each RT-RPA reaction.

### 382 **Acknowledgements**

383 This material is based upon work that is supported by the National Institute of Food and  
384 Agriculture, U.S. Department of Agriculture, under award number 2017-38640-26915 through the  
385 North Eastern Sustainable Agriculture Research and Education program under subaward number  
386 GNE18-176-32231. USDA is an equal opportunity employer and service provider.” C. Rosa is  
387 funded by AES # PEN04604, USDA HATCH accession No: 1009992.

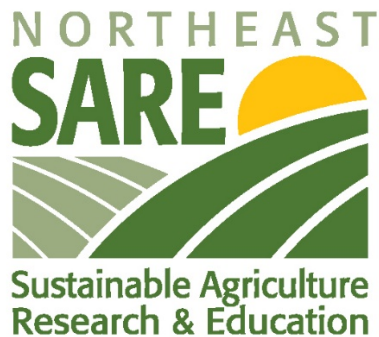

388

## 389 References

- 390 Adkins, S. (2000). Tomato spotted wilt virus—positive steps towards negative success. *Molecular Plant*  
391 *Pathology*, 1(3), 151-157.
- 392 Babu, B., Washburn, B. K., Miller, S. H., Poduch, K., Sarigul, T., Knox, G. W., . . . Paret, M. L. (2017). A  
393 rapid assay for detection of Rose rosette virus using reverse transcription-recombinase  
394 polymerase amplification using multiple gene targets. *Journal of virological methods*, 240, 78-84.
- 395 Bianco, P. R., Tracy, R. B., & Kowalczykowski, S. C. (1998). DNA strand exchange proteins: a biochemical  
396 and physical comparison. *Front Biosci*, 3, D570-D603.
- 397 Cabada, M. M., Malaga, J. L., Castellanos-Gonzalez, A., Bagwell, K. A., Naeger, P. A., Rogers, H. K., . . .  
398 White Jr, A. C. (2017). Recombinase polymerase amplification compared to real-time  
399 polymerase chain reaction test for the detection of *Fasciola hepatica* in human stool. *The*  
400 *American journal of tropical medicine and hygiene*, 96(2), 341-346.
- 401 Compton, J. (1991). Nucleic acid sequence-based amplification. *Nature*, 350(6313), 91.
- 402 Crannell, Z., Castellanos-Gonzalez, A., Nair, G., Mejia, R., White, A. C., & Richards-Kortum, R. (2016).  
403 Multiplexed Recombinase Polymerase Amplification Assay To Detect Intestinal Protozoa. *Anal*  
404 *Chem*, 88(3), 1610-1616. doi:10.1021/acs.analchem.5b03267
- 405 Crannell, Z. A., Rohrman, B., & Richards-Kortum, R. (2014). Equipment-free incubation of recombinase  
406 polymerase amplification reactions using body heat. *PLoS One*, 9(11), e112146.
- 407 Crosslin, J., Mallik, I., & Gudmestad, N. (2009). First report of Tomato spotted wilt virus causing potato  
408 tuber necrosis in Texas. *Plant disease*, 93(8), 845-845.
- 409 Daher, R. K., Stewart, G., Boissinot, M., & Bergeron, M. G. (2016). Recombinase Polymerase  
410 Amplification for Diagnostic Applications. *Clin Chem*, 62(7), 947-958.  
411 doi:10.1373/clinchem.2015.245829
- 412 Funderburk, J., Reitz, S., Stansly, P., Olson, S., Sui, D., McAvoy, G., . . . Leppla, N. (2011). Managing thrips  
413 in pepper and eggplant. *EDIS Document ENY-658, Florida Coop. Ext. Service, Univ. Florida,*  
414 *Gainesville.*
- 415 Glais, L., & Jacquot, E. (2015). Detection and characterization of viral species/subspecies using  
416 isothermal recombinase polymerase amplification (RPA) assays. In *Plant Pathology* (pp. 207-  
417 225): Springer.

- 418 Gonsalves, D., & Trujillo, E. (1986). Tomato spotted wilt virus in papaya and detection of the virus by  
419 ELISA. *Plant disease*, 70(6), 501-506.
- 420 Hagen, C., Frizzi, A., Kao, J., Jia, L., Huang, M., Zhang, Y., & Huang, S. (2011). Using small RNA sequences  
421 to diagnose, sequence, and investigate the infectivity characteristics of vegetable-infecting  
422 viruses. *Archives of virology*, 156(7), 1209-1216.
- 423 Hanssen, I. M., Lapidot, M., & Thomma, B. P. (2010). Emerging viral diseases of tomato crops. *Molecular*  
424 *plant-microbe interactions*, 23(5), 539-548.
- 425 Koo, K. M., Wee, E. J., Mainwaring, P. N., & Trau, M. (2016). A simple, rapid, low-cost technique for  
426 naked-eye detection of urine-isolated TMPRSS2: ERG gene fusion RNA. *Scientific reports*, 6,  
427 30722.
- 428 Lillis, L., Siverson, J., Lee, A., Cantera, J., Parker, M., Piepenburg, O., . . . Boyle, D. S. (2016). Factors  
429 influencing recombinase polymerase amplification (RPA) assay outcomes at point of care.  
430 *Molecular and cellular probes*, 30(2), 74-78.
- 431 Lobato, I. M., & O'Sullivan, C. K. (2018). Recombinase polymerase amplification: Basics, applications and  
432 recent advances. *Trac Trends in analytical chemistry*, 98, 19-35.
- 433 Lutz, S., Weber, P., Focke, M., Faltin, B., Hoffmann, J., Müller, C., . . . Armes, N. (2010). Microfluidic lab-  
434 on-a-foil for nucleic acid analysis based on isothermal recombinase polymerase amplification  
435 (RPA). *Lab on a chip*, 10(7), 887-893.
- 436 Mautino, G. C., Sacco, D., Ciuffo, M., Turina, M., & Tavella, L. (2012). Preliminary evidence of recovery  
437 from Tomato spotted wilt virus infection in *Frankliniella occidentalis* individuals. *Annals of*  
438 *applied biology*, 161(3), 266-276.
- 439 Mekuria, T. A., Zhang, S., & Eastwell, K. C. (2014). Rapid and sensitive detection of Little cherry virus 2  
440 using isothermal reverse transcription-recombinase polymerase amplification. *Journal of*  
441 *virological methods*, 205, 24-30.
- 442 Morsello, S. C., & Kennedy, G. G. (2009). Spring temperature and precipitation affect tobacco thrips,  
443 *Frankliniella fusca*, population growth and tomato spotted wilt virus spread within patches of  
444 the winter annual weed *Stellaria media*. *Entomologia Experimentalis et Applicata*, 130(2), 138-  
445 148.
- 446 Ng, B. Y., Wee, E. J., West, N. P., & Trau, M. (2015). Rapid DNA detection of *Mycobacterium tuberculosis*-  
447 towards single cell sensitivity in point-of-care diagnosis. *Scientific reports*, 5, 15027.
- 448 Nicaise, V. (2014). Crop immunity against viruses: outcomes and future challenges. *Frontiers in plant*  
449 *science*, 5, 660.
- 450 Ohnishi, J., Katsuzaki, H., Tsuda, S., Sakurai, T., Akutsu, K., & Murai, T. (2006). *Frankliniella cephalica*, a  
451 new vector for Tomato spotted wilt virus. *Plant disease*, 90(5), 685-685.
- 452 Pappu, H. (2008). Tomato Spotted Wilt Virus.
- 453 Piepenburg, O., Williams, C. H., Stemple, D. L., & Armes, N. A. (2006). DNA detection using  
454 recombination proteins. *PLoS biology*, 4(7), e204.
- 455 Roberts, C. A., Dietzgen, R. G., Heelan, L. A., & Maclean, D. J. (2000). Real-time RT-PCR fluorescent  
456 detection of tomato spotted wilt virus. *Journal of Virological Methods*, 88(1), 1-8.
- 457 Robertson, B. H., & Nicholson, J. K. (2005). New microbiology tools for public health and their  
458 implications. *Annu. Rev. Public Health.*, 26, 281-302.
- 459 Rohrman, B. A., & Richards-Kortum, R. R. (2012). A paper and plastic device for performing recombinase  
460 polymerase amplification of HIV DNA. *Lab on a chip*, 12(17), 3082-3088.
- 461 Silva, G., Bömer, M., Nkere, C., Kumar, P. L., & Seal, S. E. (2015). Rapid and specific detection of Yam  
462 mosaic virus by reverse-transcription recombinase polymerase amplification. *Journal of*  
463 *virological methods*, 222, 138-144.
- 464 TwistDx. (2009). Appendix to the Twist Amp TM reaction kit manuals. In: TwistDx Cambridge, UK.

- 465 Van Leeuwen, L., Arrieta, I. S., Guiderdone, S. M., Turina, M., & Ciuffo, M. (2017). TSWV resistant  
466 Capsicum plants. In: Google Patents.
- 467 Webb, S., Tsai, J., & Mitchell, F. (1998). *Bionomics of Frankliniella bispinosa and its transmission of*  
468 *tomato spotted wilt virus*. Paper presented at the Abstract: Fourth International Symposium on  
469 tospoviruses and thrips in floral and vegetable crops. Wageningen, The Netherlands.
- 470 Wee, E. J., Ngo, T. H., & Trau, M. (2015). A simple bridging flocculation assay for rapid, sensitive and  
471 stringent detection of gene specific DNA methylation. *Scientific reports*, *5*, 15028.
- 472 Ye, J., Coulouris, G., Zaretskaya, I., Cutcutache, I., Rozen, S., & Madden, T. L. (2012). Primer-BLAST: a tool  
473 to design target-specific primers for polymerase chain reaction. *BMC bioinformatics*, *13*(1), 134.
- 474 Zhang, S., Ravelonandro, M., Russell, P., McOwen, N., Briard, P., Bohannon, S., & Vrient, A. (2014). Rapid  
475 diagnostic detection of plum pox virus in Prunus plants by isothermal AmplifyRP® using reverse  
476 transcription-recombinase polymerase amplification. *Journal of virological methods*, *207*, 114-  
477 120.
- 478
